# Supplementary material for: A new strategy to directly construct hybrid luminescence–photothermal–magnetism multifunctional nanocomposites for cancer up-conversion imaging and photothermal therapy
Source: Royal Society of Chemistry journal article supplement (doi:10.1039/c5ra23632k), 2015-12-22
Supplement: c5ra23632k1.pdf [file c5ra23632k1.pdf]

## Supporting Information

### A new strategy to directly construct the hybrid luminescence- photothermal-magnetism multifunctional nanocomposites for cancer up-conversion imaging and photothermal therapy

Wenjia Liu, Guixia Liu\*, Jinxian Wang, Xiangting Dong and Wensheng Yu

Key Laboratory of Applied Chemistry and Nanotechnology at Universities of Jilin Province, Changchun University of Science and Technology, Changchun 130022, P. R. China. E-mail address: liuguixia22@163.com; Tel.: +86-431-85582574. Fax: +86-431-85383815.

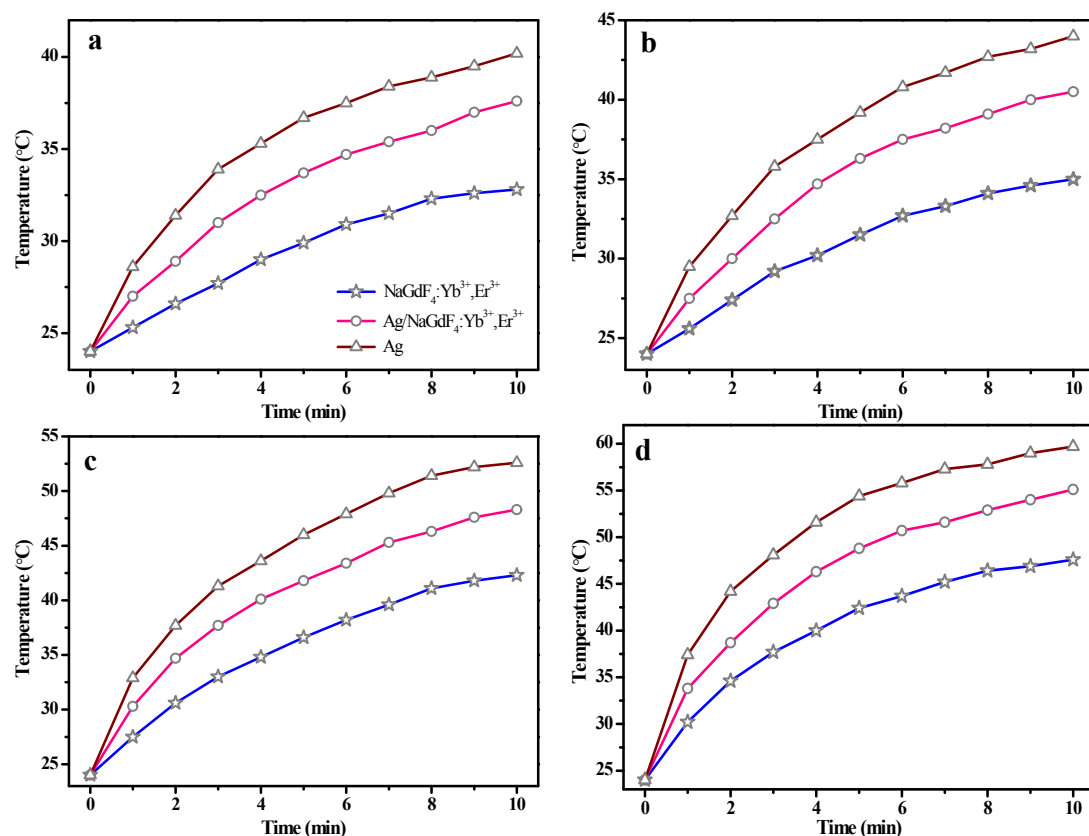

**Fig. S1** The temperature of NaGdF<sub>4</sub>:Yb<sup>3+</sup>,Er<sup>3+</sup> nanoparticles, Ag/NaGdF<sub>4</sub>:Yb<sup>3+</sup>,Er<sup>3+</sup> nanocomposites and Ag nanoparticles as a function of excitation time at different concentrations: (a) 0.05, (b) 0.1, (c) 0.25 and (d) 0.5 mg mL<sup>-1</sup>.
